CORRECTION

# Correction: Baseline Levels and Temporal Stability of 27 Multiplexed Serum Cytokine Concentrations in Healthy Subjects

Angelique Biancotto, Abigail Wank, Shira Perl, Wendell Cook, Matthew J. Olnes, Pradeep K. Dagur, J. Christopher Fuchs, Marc Langweiler, Ena Wang, J. Philip McCoy

The authors wish to correct some errors with the data that came to light after the publication of the article:

Due to an error, the original [Fig 2](#) shows the median values, rather than the mean values as is stated. A revised [Fig 2](#) plotting the means is provided here.

There was a discrepancy in the handling of data for [Table 2](#). In the construction of the gender side of this table, we assigned values of "0" to any value that was out of range (OOR) low in order to allow statistical analysis. In the ethnicity side of the table, OOR readings were ignored in calculations rather than being assigned a value of "0". This led to inconsistencies in whole-population means between the ethnicity and gender analyses for cytokines where some values were OOR, but not for other cytokines where all values were in range. A revised [Table 2](#) is provided in which all means have been calculated using a value of "0" where the reading was OOR low.

Supplemental [S4 Table](#) also includes errors where some OOR values had not been replaced with "0" values. A revised version is provided here, as [S4 Table](#).

The authors would like to apologize for these errors and confirm that these corrections do not affect the conclusions presented in the article.

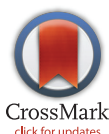

## OPEN ACCESS

**Citation:** Biancotto A, Wank A, Perl S, Cook W, Olnes MJ, Dagur PK, et al. (2015) Correction: Baseline Levels and Temporal Stability of 27 Multiplexed Serum Cytokine Concentrations in Healthy Subjects. PLoS ONE 10(7): e0132870. doi:10.1371/journal.pone.0132870

**Published:** July 6, 2015

**Copyright:** © 2015 Biancotto et al. This is an open access article distributed under the terms of the [Creative Commons Attribution License](#), which permits unrestricted use, distribution, and reproduction in any medium, provided the original author and source are credited.

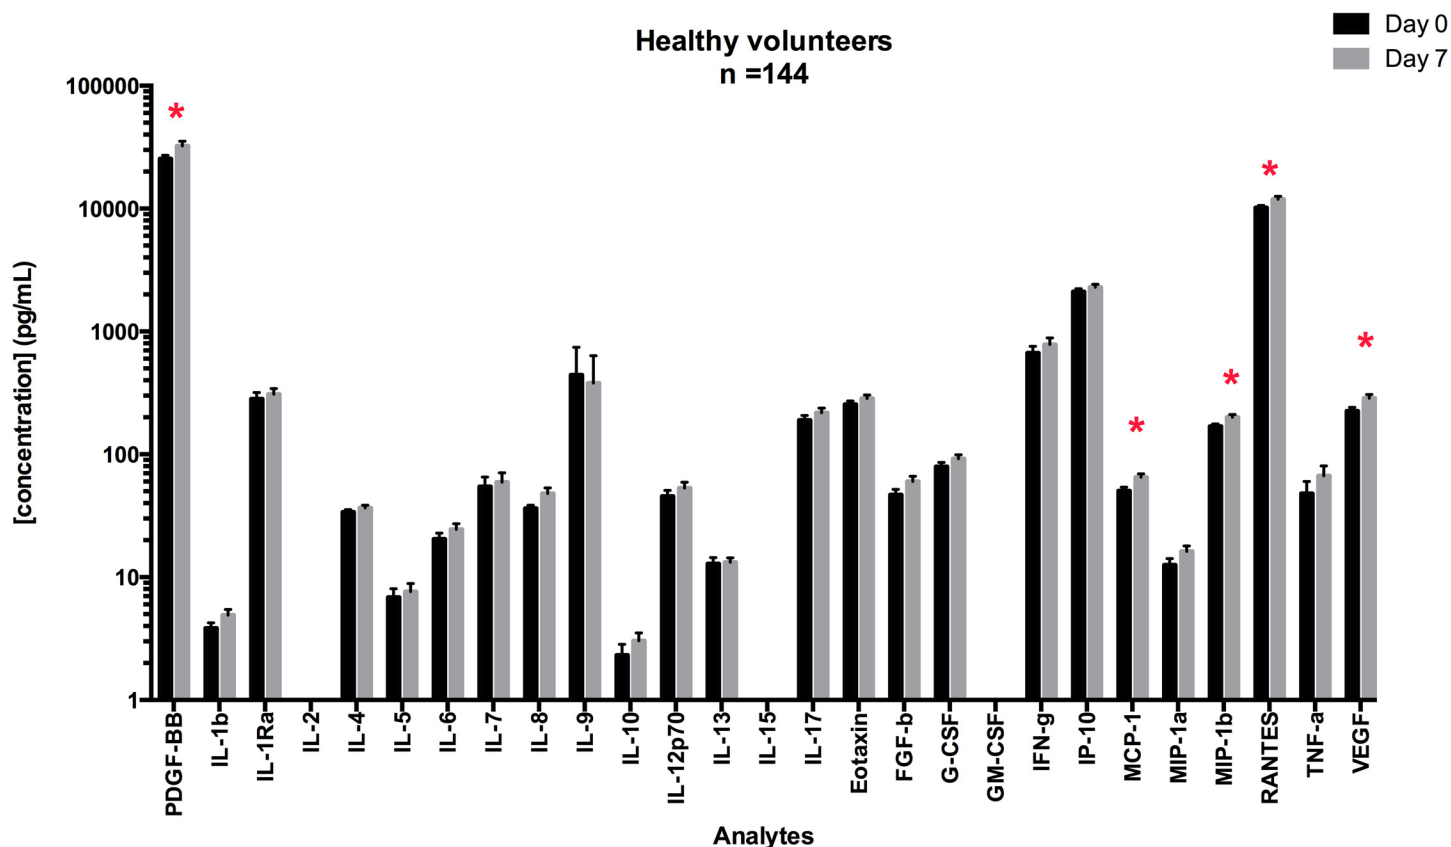

**Fig 2. Mean concentrations for cytokines in serum samples at Day 0 and Day 7.** Serum cytokine concentrations were measured on matched samples at Day 0 and Day 7. Paired T-tests were performed to measure the significance of the difference of the mean between Day 0 and Day 7. Cytokines for which % CV is higher than 20% are shown with “\*”.

doi:10.1371/journal.pone.0132870.g001

Table 2. Mean serum cytokine concentrations for Men and Women, and Caucasian vs Non Caucasian.

|          | Gender analysis |            |                  | Ethnicity analysis |                    |         |
|----------|-----------------|------------|------------------|--------------------|--------------------|---------|
|          | Men Mean        | Women Mean | p value          | CaucasianMean      | Non caucasian Mean | p value |
| PDGF-BB  | 31617.7         | 27537.4    | 0.30             | 28529.5            | 29919.3            | 0.87    |
| IL-1b    | 4.6             | 4.3        | 0.64             | 4.5                | 4.2                | 0.84    |
| IL-1Rα   | 279.5           | 304.5      | 0.54             | 257.3              | 383.2              | 0.16    |
| IL-2     | nd              | nd         | na               | nd                 | nd                 | na      |
| IL-4     | 33.4            | 36.0       | 0.34             | 34.0               | 37.7               | 0.57    |
| IL-5     | 5.8             | 8.0        | 0.18             | 6.5                | 8.9                | 0.58    |
| IL-6     | 18.3            | 24.9       | 0.64             | 23.4               | 20.7               | 0.78    |
| IL-7     | 52.2            | 59.5       | 0.60             | 48.0               | 77.3               | 0.42    |
| IL-8     | 38.3            | 44.2       | 0.24             | 43.4               | 39.2               | 0.79    |
| IL-9     | 113.6           | 573.3      | 0.13             | 150.7              | 1011.3             | 0.19    |
| IL-10    | 2.7             | 2.7        | 0.94             | 2.8                | 2.5                | 0.87    |
| IL-12p70 | 42.3            | 53.4       | 0.13             | 47.5               | 54.3               | 0.74    |
| IL-13    | 11.2            | 14.1       | 0.10             | 13.0               | 13.3               | 0.94    |
| IL-15    | nd              | nd         | na               | nd                 | nd                 | na      |
| IL-17    | 208.2           | 201.5      | 0.79             | 178.9              | 260.4              | 0.13    |
| Eotaxin  | 290.4           | 257.4      | 0.23             | 275.2              | 254.5              | 0.77    |
| FGF-b    | 53.0            | 54.3       | 0.86             | 49.9               | 62.9               | 0.51    |
| G-CSF    | 70.3            | 93.7       | 0.32             | 83.6               | 89.9               | 0.80    |
| GM-CSF   | nd              | nd         | na               | nd                 | nd                 | na      |
| IFN-γ    | 542.8           | 822.7      | 0.38             | 725.8              | 725.0              | 1.00    |
| IP-10    | 2137.4          | 2238.1     | 0.58             | 2040.2             | 2573.3             | 0.20    |
| MCP-1    | 62.8            | 55.4       | 0.23             | 66.0               | 39.9               | 0.09    |
| MIP-1α   | 13.2            | 15.1       | 0.36             | 14.3               | 14.9               | 0.92    |
| MIP-1β   | 206.8           | 173.5      | <b>&lt;0.001</b> | 189.8              | 174.4              | 0.67    |
| RANTES   | 9534.5          | 11848.9    | <b>&lt;0.001</b> | 11095.7            | 10930.6            | 0.94    |
| TNF-α    | 37.0            | 68.7       | 0.52             | 72.0               | 25.3               | 0.36    |
| VEGF     | 246.0           | 263.3      | 0.50             | 239.7              | 297.3              | 0.37    |

p values in bold are significant (P<0.05)

nd = not detectable for more than 2/3 of samples measured

na = not applicable

doi:10.1371/journal.pone.0132870.t001

## Supporting Information

### S4 Table.

(XLSX)

## Reference

1. Biancotto A, Wank A, Perl S, Cook W, Olmes MJ, Dagur PK, et al. (2013) Baseline Levels and Temporal Stability of 27 Multiplexed Serum Cytokine Concentrations in Healthy Subjects. PLoS ONE 8(12): e76091. doi: [10.1371/journal.pone.0076091](https://doi.org/10.1371/journal.pone.0076091) PMID: [24348989](https://pubmed.ncbi.nlm.nih.gov/24348989/)
